# Supplementary material for: Increasing leaf sizes of the vine Epipremnum aureum (Araceae): photosynthesis and respiration
Source: PeerJ journal article supplement (doi:10.7717/peerj.19214), 2025-04-04
Supplement: Fig_S1.pdf [file Fig_S1.pdf]

Supplemental Material 3

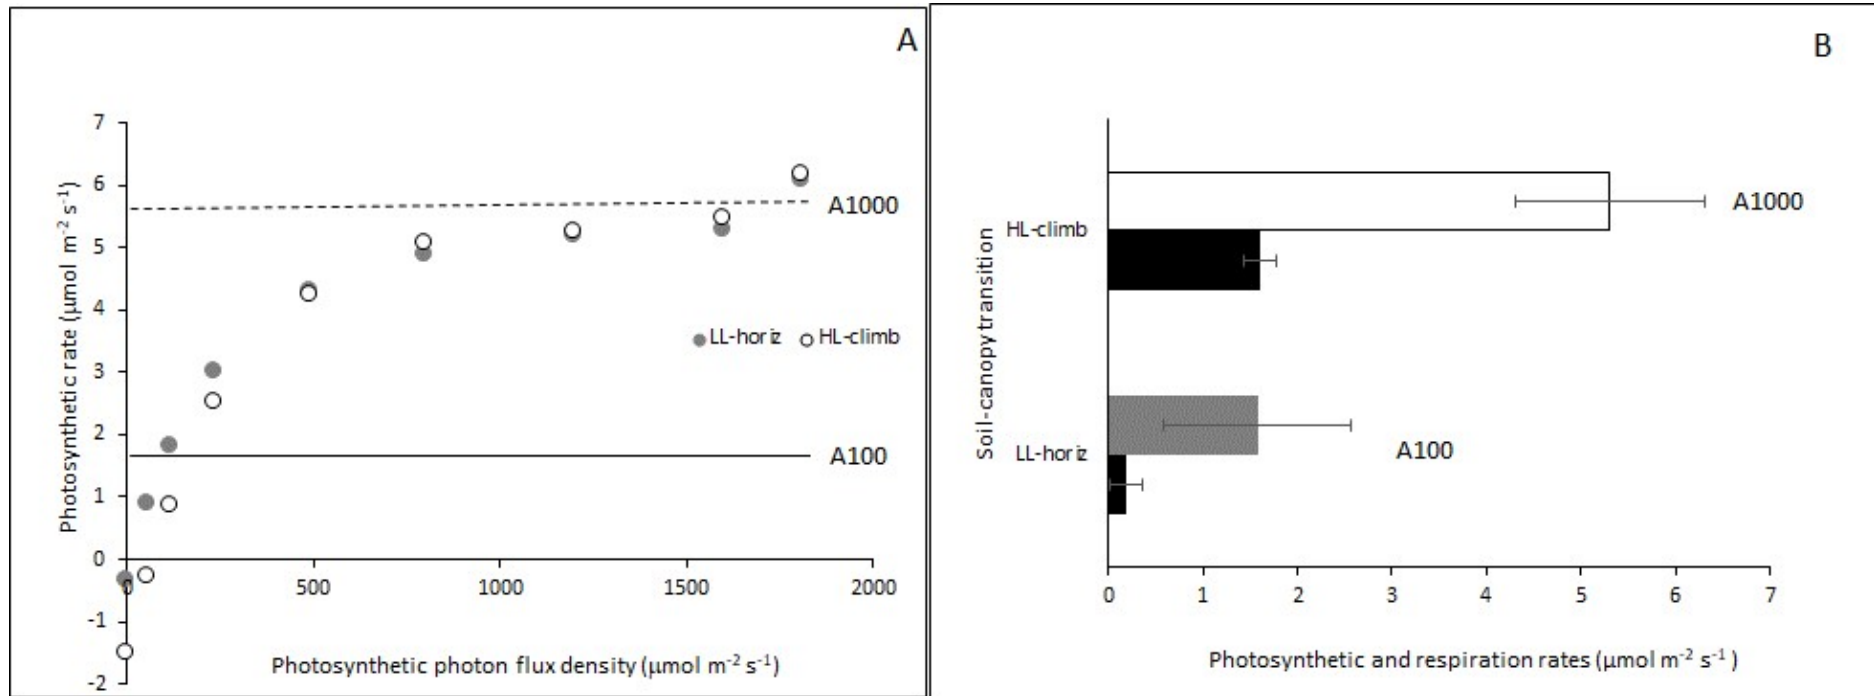

Figures A and B. Photosynthetic light rates for LL-horiz (gray circle) and HL-climb (white circle) leaves of *E. aureum* obtained via light curves (A) and applied for both treatments if occurring under natural light conditions (B). In figure A, mean values of leaf photosynthesis show similar light curves for both treatments. However, using the same curves, photosynthetic rate of smaller leaves at understory conditions (A100 line, gray bar) is much lower than at canopies (A1000 line, dashed line). Figure B depicts photosynthetic rate along soil (LL-horiz, A100) to canopy (HL-climb, A1000) transition using data from light curves. White bar indicates photosynthesis of large leaves (represented by HL-climb) at canopy conditions (A1000) and gray bar indicate photosynthesis of smaller leaves (represented by LL-horiz) at understory (A100). For the sake of comparison, the respective  $R_d$  value for each treatment is indicated (black bar).
