# Supplementary material for: Increasing leaf sizes of the vine Epipremnum aureum (Araceae): photosynthesis and respiration
Source: PeerJ journal article supplement (doi:10.7717/peerj.19214), 2025-04-04

Supplementary material **Fig. S2. Plant growth of *Epipremnum aureum* growing under different light conditions (low and high light) and growth directions (horizontal and vertical) along 10 months of experiment.** (A) Dry mass increment; (B) Leaf area increase. Closed symbols denote lowlight treatments (LL-horiz and LL-climb). Open symbols denote high light treatments (HL-horiz and HL-climb). Circles represent horizontal treatments (LL-horiz and HL-horiz) while climbing treatments (LL-climb and HL-climb) are represented by triangles (n=5; mean  $\pm$  s.d.).

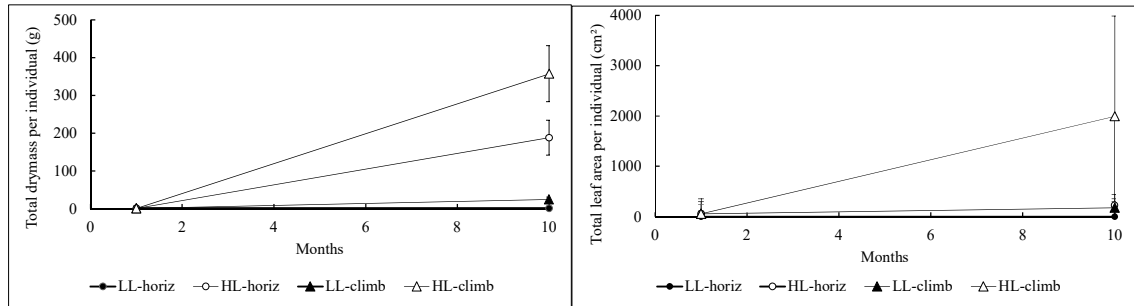

Supplement: Fig_S2.pdf [file Fig_S2.pdf]
