# Supplementary material for: Increasing leaf sizes of the vine Epipremnum aureum (Araceae): photosynthesis and respiration
Source: PeerJ journal article supplement (doi:10.7717/peerj.19214), 2025-04-04

**Fig. S3. Plant growth parameters of *E. aureum* leaves under different light conditions and growth directions.** (A) Relative growth rate (RGR); (B) Net assimilation rate (NAR). Symbol \* indicates statistical differences between different light conditions; symbol # indicates statistical differences between different growth directions ( $p < 0.05$ ;  $n = 5$ ). LL-horiz: low light horizontal; HL-horiz: high light horizontal; LL-climb: low light vertical; and HL-climb: high light vertical.

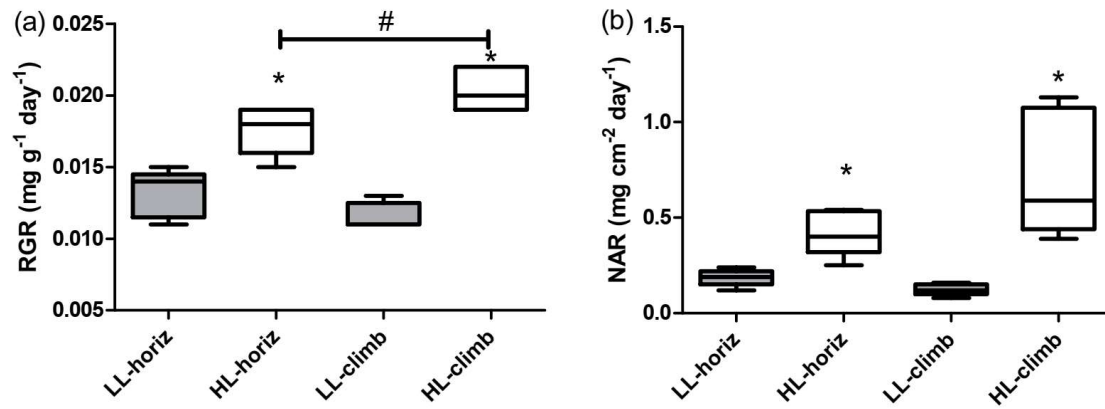

Supplement: Fig_S3.pdf [file Fig_S3.pdf]
