# Supplementary material for: Increasing leaf sizes of the vine Epipremnum aureum (Araceae): photosynthesis and respiration
Source: PeerJ. 2025 Apr 4;13:e19214. doi: 10.7717/peerj.19214 (PMC11974542; doi:10.7717/peerj.19214)
Supplement: Supplemental Information 1 [file peerj-13-19214-s001.xlsx]

## Sheet: Photosynthesis
			PeerJ
			Raw data for Epipremnum aurem leaves - photosynthesis and respiration (2025)
																							Data written on results section
			Fig 2a					Fig 2b					Fig 2c					Fig 2d					A100 x A1000 (µmol m-2 s-1)
			ETR (µmol m-2 s-1)					Amax (µmol m-2 s-1)					LSP (µmol m-2 s-1)					Rd (µmol m-2 s-1)					A100	A1000
			LL-horiz	HL-horiz	LL-climb	HL-climb		LL-horiz	HL-horiz	LL-climb	HL-climb		LL-horiz	HL-horiz	LL-climb	HL-climb		LL-horiz	HL-horiz	LL-climb	HL-climb		LL-horiz	HL-climb
			35.7	132.19	51.16	177.86		5.63	9.92	2.78	9.44		917	1013	1068	1177		0.2	1.5	0.01	2.3		1.16	9.07
			46.9	181.4	44.3	158.12		4.58	6.11	3.21	3.75		760	655	637	510		0.4	0.7	0.01	1.3		0.98	4.05
			45.2	177.12	65	139.28		4.03	7.15	4.12	5.83		783	557	625	735		0.3	0.9	0.01	1.7		0.83	6.11
			62.6	113.08	64	114.63		3.26	6.76	3.73	2.54		250	960	414	700		0.01	0.6	0.5	1.4		2.36	2.87
			48.66	109.81	63.14	101.86		6.75	4.5	4.19	4.11		597	1014	492	620		0.01	0.9	0.5	1.3		2.54	4.43
		mean	47.812	142.72	57.52	138.35		4.85	6.888	3.606	5.134		661.4	839.8	647.2	748.4		0.184	0.92	0.206	1.6		1.574	5.306
		std.dev	9.66642	34.4673	9.28363	31.0118		1.36856	1.97395	0.604094	2.6795		256.533	217.324	253.051	254.726		0.173868	0.349285	0.268384	0.424264		0.810666	2.40277

## Sheet: Morpho-physiology
			PeerJ
			Raw data for Epipremnum aurem leaves - morphophysiology (2025)
			Leaf area					Succulence					Specific leaf area					Nitrogen
			m2					(g/m2)					SLA (m2/g)					(N; %)
			LL-horiz	HL-horiz	LL-climb	HL-climb		LL-horiz	HL-horiz	LL-climb	HL-climb		LL-horiz	HL-horiz	LL-climb	HL-climb		LL-horiz	HL-horiz	LL-climb	HL-climb
			75.2	153.6	112.7	1163.9		267	304	239	262		357.143	125	357.143	156.25		3.62	2.88	3.77	4.05
			56.7	58.9	163.9	1256.2		296	311	237	280		357.143	153.846	333.333	151.515		3.41	3.72	3.33	3.43
			71.14	238.7	74.7	966.8		345	333	227	255		250	200	322.581	147.059		3.05	3.93	2.94	3.21
			113.7	105.8	130.5	1370.6		299	392	228	220		238.095	156.25	303.03	158.73		2.7	3.79	3	3.47
			127.8	92.39	79.2	1052.3		285	349	190	244		357.143	140.845	384.615	166.667		3.89	3.04	3.31	3.08
		mean	88.908	129.878	112.2	1161.96		298.4	337.8	224.2	252.2		311.905	155.188	340.141	156.044		3.334	3.472	3.27	3.448
		std.dev	30.2828	69.6921	37.092	160.1		28.9102	35.1667	19.8419	22.2531		62.0876	27.9646	31.6186	7.4388		0.46886	0.476833	0.33053	0.372586

## Sheet: Anatomy
			Supplemental material 1
			PeerJ
			Raw data for Epipremnum aurem leaves - morphophysiology (2025)
			Leaf					Mesophyll					Palisade/Spongy ratio						Air space					Vein density					Stomatal density
			Thickness (mm)					Thickness (mm)					unitless						(%)					VD (cm/cm2)					SD (n /mm2)
			LL-horiz	HL-horiz	LL-climb	HL-climb		LL-horiz	HL-horiz	LL-climb	HL-climb		LL-horiz	HL-horiz	LL-climb	HL-climb			LL-horiz	HL-horiz	LL-climb	HL-climb		LL-horiz	HL-horiz	LL-climb	HL-climb		LL-horiz	HL-horiz	LL-climb	HL-climb
			291	427	338	362		177	314	209	304		0.506573	0.540357	0.629309	0.51			27.1153	25.4287	21.726			40.6245	33.9308	22.3843	21.2905		56.9424	45.5539	34.1655	56.9424
			303	352	304	312		218	280	202	262		0.364666	0.503685	0.929138	0.516588			22.6329	21.3356	27.9529	15.2648		24.3408	35.402	20.6589	44.499		22.777	45.5539	22.777	56.9424
			269	395	315	368		182	316	218	306		0.666232	0.561273	0.500148	0.484301			18.2395	20.0515	24.2349	26.803		31.6739	41.9109	24.0327	47.4107		22.777	56.9424	45.5539	68.3309
			363	459	332	322		244	368	228	259		0.449155	0.397687	0.582079	0.520802			24.5104	14.9693	21.9624	20.6959		31.62	41.2408	31.1501	54.6436		45.5539	34.1655	45.5539	56.9424
			293	358	282	299		199	274	189	242		0.560468	0.699081	0.545047	0.531112			10.8938	17.7394	20.2558	16.0409		25.2806	36.4881	24.0866	45.8393		34.1655	45.5539	22.777	68.3309
		mean	303.8	398.2	314.2	332.6		204	310.4	209.2	274.6		0.509419	0.540416	0.637144	0.512561			20.6784	19.9049	23.2264	19.7012		30.708	37.7945	24.4625	42.7366		36.4431	45.5539	34.1655	61.4978
		std.dev	35.344	45.5159	22.4989	30.7539		27.5409	37.454	14.9231	28.7889		0.113787	0.108778	0.170002	0.0175602			6.35659	3.92527	3.00127	5.30736		6.52112	3.57701	3.99488	12.6124		14.8488	8.05287	11.3885	6.23773

## Sheet:  RGR NAR
			Supplemental material 1
			PeerJ
			Raw data for Epipremnum aurem leaves - morphophysiology (2025)
			Treatment	INITIAL TOTAL DRY MASS (g)	INITIAL TOTAL LEAF AREA (cm²)	FINAL TOTAL DRYMASS (g)	FINAL TOTAL LEAF AREA (cm²)	RGR (mg g-1 day-1)	NAR (mg * cm-2 * day-1)
			LL-horiz	1.1841	133.771	40.23	1423.05	0.0117521	0.238689
			LL-horiz	0.9781	271.244	29.88	1775.27	0.0113978	0.120338
			LL-horiz	0.6519	128.957	40.76	2027.95	0.0137852	0.19398
			LL-horiz	0.62	136.415	40.47	2167.25	0.0139287	0.180887
			LL-horiz	0.4893	175.523	40.04	1622.95	0.0146822	0.202589
								0.0131092	0.187297	mean
								0.00144685	0.0431399	standard deviation
			HL-horiz	1.0136	223.496	241.15	4706.91	0.0182397	0.544072
			HL-horiz	1.2322	255.096	123.49	5263.5	0.0153579	0.246295
			HL-horiz	0.639	172.152	165.74	4889.23	0.0185276	0.390423
			HL-horiz	1.1818	136.242	218.04	5083.17	0.0173921	0.528857
			HL-horiz	0.71	230.397	191.53	5181.31	0.0186584	0.399943
								0.0176351	0.421918	mean
								0.00136511	0.121116	standard deviation
			LL-climb	0.8258	131.274	22.17	1529.82	0.0109671	0.124923
			LL-climb	0.643	140.919	18.07	1955.66	0.0111195	0.084196
			LL-climb	0.7496	146.328	32.62	1807.73	0.0125771	0.160751
			LL-climb	1.1237	150.424	27.47	1615.09	0.0106549	0.142326
			LL-climb	0.6537	112.039	23.19	1883.93	0.0118961	0.119653
								0.011443	0.12637	mean
								0.000781623	0.028559	standard deviation
			HL-climb	0.7711	161.267	265.76	9338.25	0.0194751	0.390666
			HL-climb	1.0583	252.872	340.44	8375.86	0.0192453	0.487469
			HL-climb	0.6135	102.97	390.25	4410.73	0.0215179	1.13284
			HL-climb	0.6162	150.068	464.22	5656.05	0.0220818	1.01865
			HL-climb	0.7044	149.887	327.42	7256.82	0.0204722	0.594535
								0.0205584	0.724832	mean
								0.00123963	0.330827	standard deviation
